# Supplementary material for: Chromatin organization drives the search mechanism of nuclear factors
Source: PubMed Central journal article supplement (PMC10575952; doi:10.1038/s41467-023-42133-5), 2023-10-13
Supplement: 41467_2023_42133_MOESM3_ESM.pdf [file 41467_2023_42133_MOESM3_ESM.pdf]

## **Description of Additional Supplementary Files**

File Name: Supplementary Movie 1

Description: Exemplary SMT/mSIM acquisition for Halotag, p65, p53, CTCF and H2B. Movies collected at 100fps and displayed at 30fps.

File Name: Supplementary Movie 2

Description: Exemplary paSMT acquisition for Halotag, p65, p53, CTCF and H2B. Movies collected at 100fps and displayed at 30fps.
